# Supplementary material for: Effect of Vitamin D Deficiency on COVID-19 Status: A Systematic Review
Source: MDPI journal article supplement (doi:10.3390/covid1010008), 2021-07-07
Supplement: s1 [file s1]

## Supplementary Tables

**Table S1:** PubMed Search Results for Vitamin D Status and COVID-19

| Search Strategy                                                                                                                                                                                                                       | Results |
|---------------------------------------------------------------------------------------------------------------------------------------------------------------------------------------------------------------------------------------|---------|
| ("Vitamin D," OR "25-Hydroxyvitamin D," OR "Low Vitamin D.") AND ("COVID-19" OR "2019-nCoV" OR "Coronavirus" OR "SARS-CoV-2") AND ("disease severity" OR "IMV" OR "ICU admission" OR "mortality" OR "hospitalization" OR "infection") | 135     |
| <b>Timespan:</b> 1/12/2019 to 3/11/2020, <b>Article Type:</b> Journal Article, <b>Language:</b> English                                                                                                                               |         |

**Table S2:** Google Scholar Search Results for Vitamin D Status and COVID-19

| Search Strategy                                                                                                                                                                                                                       | Results |
|---------------------------------------------------------------------------------------------------------------------------------------------------------------------------------------------------------------------------------------|---------|
| ("Vitamin D," OR "25-Hydroxyvitamin D," OR "Low Vitamin D.") AND ("COVID-19" OR "2019-nCoV" OR "Coronavirus" OR "SARS-CoV-2") AND ("disease severity" OR "IMV" OR "ICU admission" OR "mortality" OR "hospitalization" OR "infection") | 2630    |
| <b>Timespan:</b> Since 2020 <b>Language:</b> English                                                                                                                                                                                  |         |

**Table S3:** ScienceDirect Search Results for Vitamin D Status and COVID-19

| Search Strategy                                                                                                                                                                                                                       | Results |
|---------------------------------------------------------------------------------------------------------------------------------------------------------------------------------------------------------------------------------------|---------|
| ("Vitamin D," OR "25-Hydroxyvitamin D," OR "Low Vitamin D.") AND ("COVID-19" OR "2019-nCoV" OR "Coronavirus" OR "SARS-CoV-2") AND ("disease severity" OR "IMV" OR "ICU admission" OR "mortality" OR "hospitalization" OR "infection") | 9       |
| <b>Article Type:</b> Research Article                                                                                                                                                                                                 |         |

**Table S4.** Newcastle-Ottawa Scale Assessment of Study Quality for Cross-sectional Study

| Author                         | Selection                        |             |                           |                 | Comparability                                                                                                                       | Outcome               |                                 | Study Quality |
|--------------------------------|----------------------------------|-------------|---------------------------|-----------------|-------------------------------------------------------------------------------------------------------------------------------------|-----------------------|---------------------------------|---------------|
|                                | 1                                | 2           | 3                         | 4               | 5                                                                                                                                   | 6                     | 7                               |               |
|                                | Representativeness of the sample | Sample size | Ascertainment of exposure | Non-respondents | The subjects in different outcome groups are comparable, based on the study design or analysis. Confounding factors are controlled. | Assessment of outcome | Statistical test is appropriate |               |
| Maghbooli <i>et al.</i> , 2020 | *                                | *           | *                         |                 | *                                                                                                                                   | *                     | *                               | 6             |
| Hastie <i>et al.</i> , 2020    | *                                | *           | *                         |                 |                                                                                                                                     | *                     | *                               | 5             |
| Merzon <i>et al.</i> , 2020    | *                                | *           | *                         |                 |                                                                                                                                     | *                     | *                               | 5             |
| Kaufman <i>et al.</i> , 2020   | *                                | *           | *                         | *               |                                                                                                                                     | *                     | *                               | 6             |

**Table S5.** Newcastle-Ottawa Scale Assessment of Study Quality for Cohort Study

| Author                          | Selection                           |                                                  |                           |                                          | Comparability                      |                                       | Outcome                       |                                             |                                 | Study Quality |
|---------------------------------|-------------------------------------|--------------------------------------------------|---------------------------|------------------------------------------|------------------------------------|---------------------------------------|-------------------------------|---------------------------------------------|---------------------------------|---------------|
|                                 | 1                                   | 2                                                | 3                         | 4                                        | 5A                                 | 5B                                    | 6                             | 7                                           | 8                               |               |
|                                 | Exposed cohort truly representative | Non-exposed cohort drawn from the same community | Ascertainment of exposure | Outcome of interest not present at start | Cohorts comparable on basis of age | Cohorts comparable on other factor(s) | Quality of outcome assessment | Follow-up long enough for outcomes to occur | Complete accounting for cohorts |               |
| Abrishami <i>et al.</i> , 2020  | *                                   |                                                  | *                         | *                                        |                                    |                                       | *                             | *                                           |                                 | 5             |
| Radujkovic <i>et al.</i> , 2020 | *                                   |                                                  | *                         | *                                        |                                    |                                       | *                             | *                                           |                                 | 5             |
| Otros <i>et al.</i> , 2020      | *                                   |                                                  | *                         | *                                        |                                    |                                       | *                             | *                                           |                                 | 5             |
| Meltzer <i>et al.</i> , 2020    | *                                   |                                                  | *                         | *                                        |                                    |                                       | *                             | *                                           |                                 | 5             |
| D'avolio <i>et al.</i> , 2020   | *                                   | *                                                | *                         | *                                        |                                    |                                       | *                             | *                                           |                                 | 6             |
| Baktash <i>et al.</i> , 2020    | *                                   |                                                  | *                         | *                                        |                                    |                                       | *                             | *                                           |                                 | 5             |

**Table S6.** Newcastle-Ottawa Scale Assessment of Study Quality for Case Control Study

[illegible]
